# Supplementary material
Source: MDPI journal article supplement (https://www.mdpi.com/1424-8247/17/3/345)
Supplement: s1 [file s1]

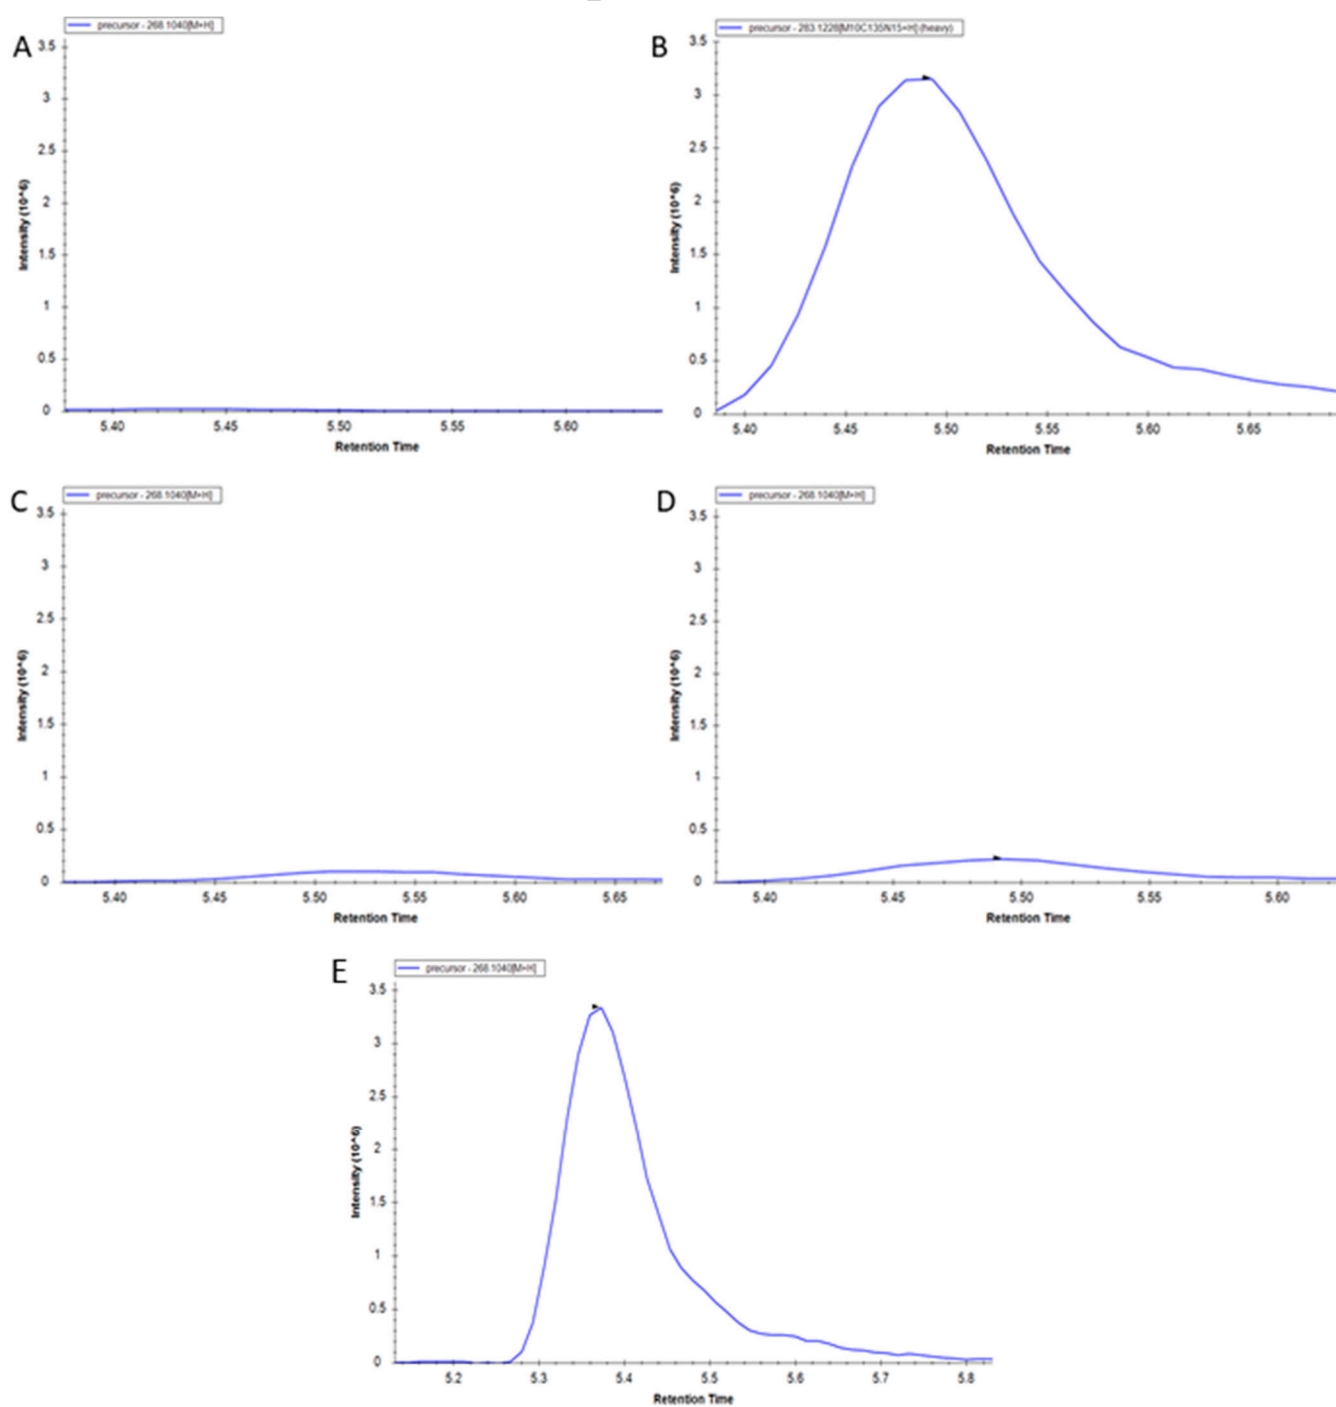

**Figure S1.** Representative chromatograms of a mobile phase (A), internal standard (B), adenosine at LOQ (C), which is 3.75 nM, blood sample (D) and adenosine at HOQ (E), which is 1872 nM.

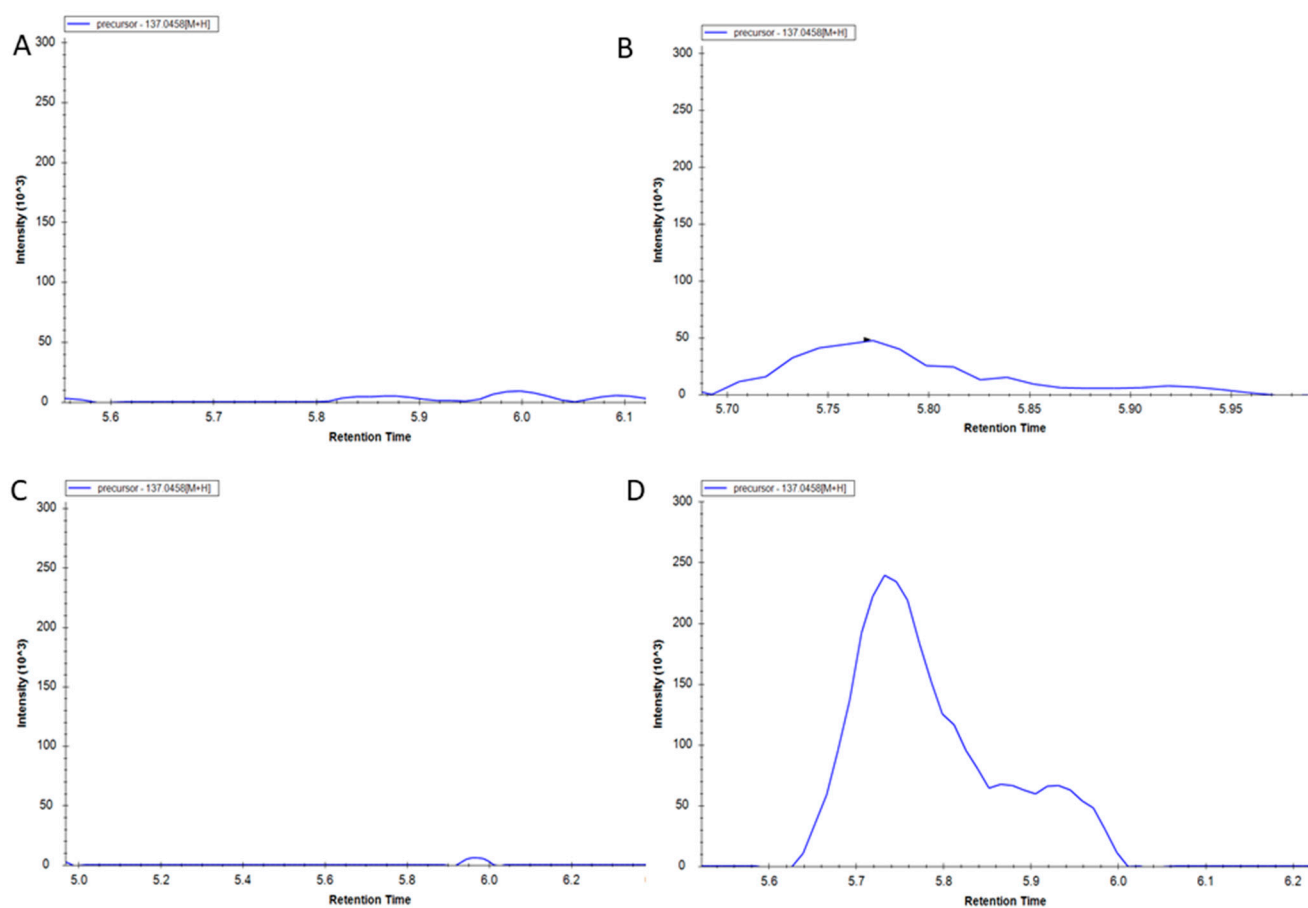

**Figure S2.** Representative chromatograms of a mobile phase (A), hypoxanthine at LOQ (B), which is 73.5 nM, blood sample (C) and hypoxanthine at HOQ (D), which is 7353 nM.

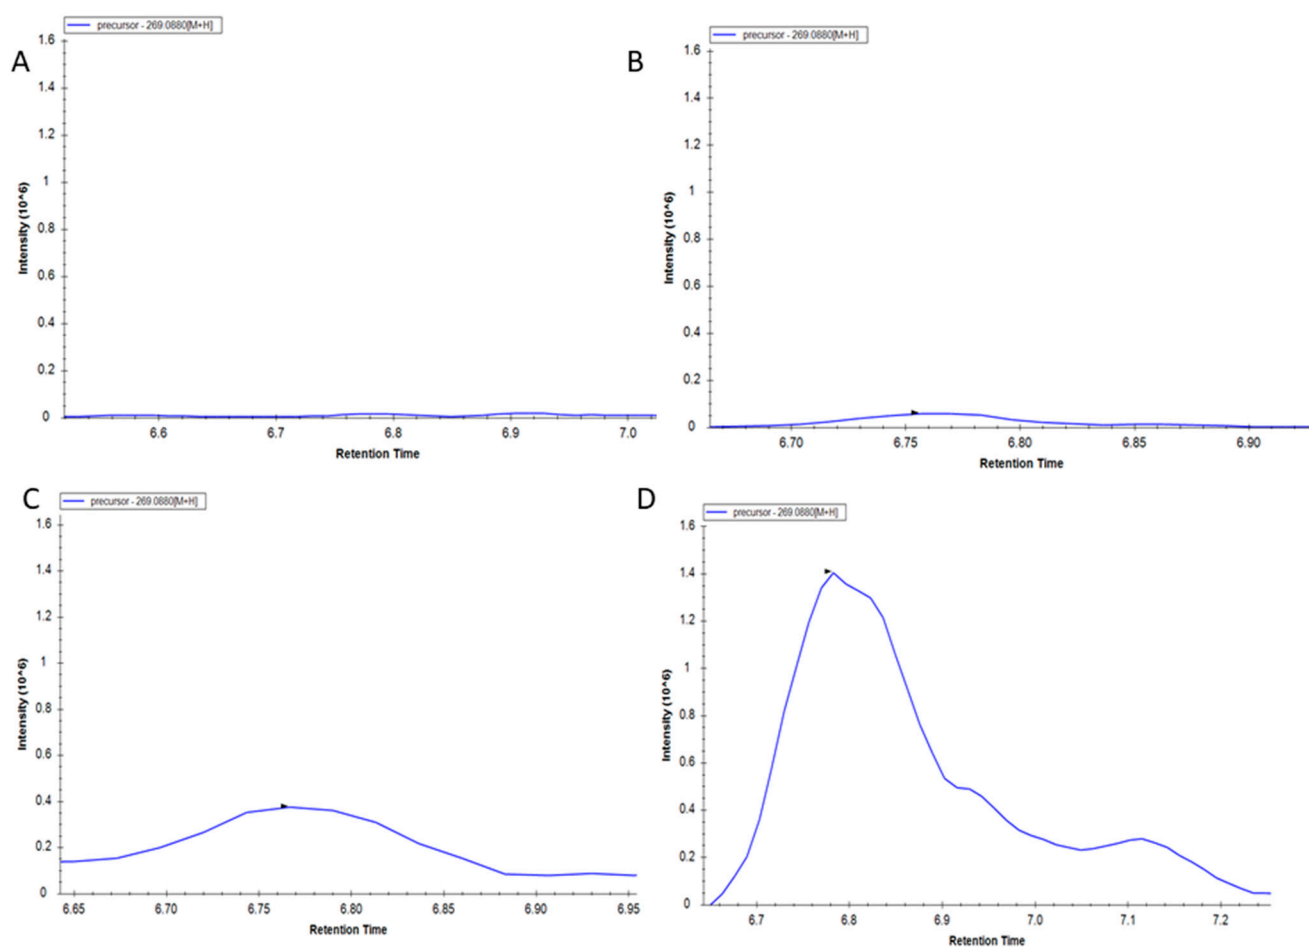

**Figure S3.** Representative chromatograms of a mobile phase (A), inosine at LOQ (B), which is 37.2 nM, blood sample (C) and inosine at HQ (D), which is 3718 nM.

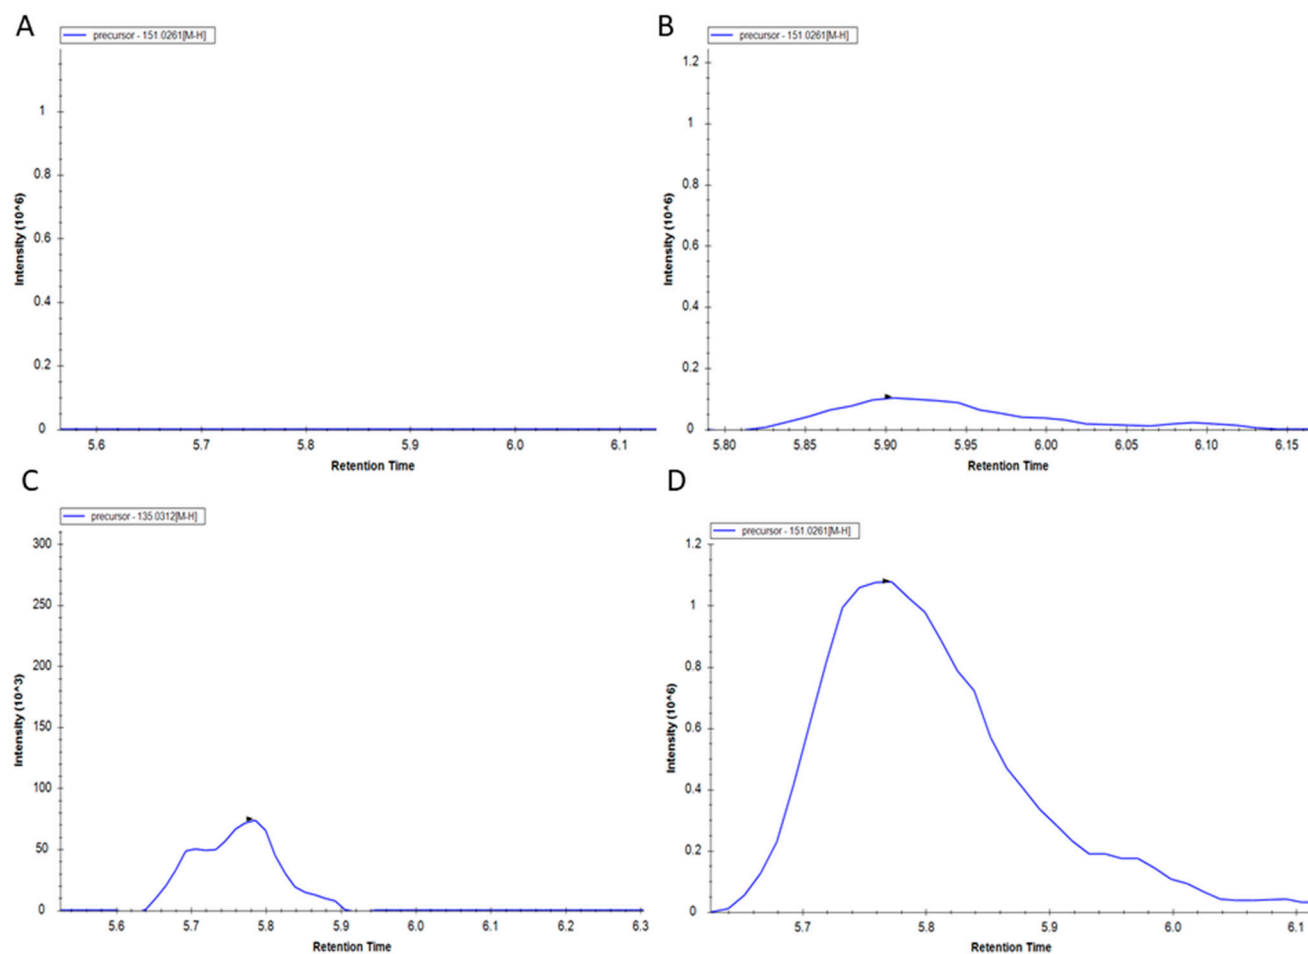

**Figure S4.** Representative chromatograms of a mobile phase (A), xanthine at LOQ (B), which is 6.5 nM, blood sample (C) and xanthine at HOQ (D), which is 6579 nM.
